# Supplementary material for: Investigating the Role of T-Cell Avidity and Killing Efficacy in Relation to Type 1 Diabetes Prediction
Source: PLOS journal article supplement (doi:10.1371/journal.pone.0014796), 2011-05-10
Supplement: S1 (10.1371/journal.pone.0014796.s001) [file journal.pone.0014796.s001]

# Supplementary Material S1: Investigating the Role of T-Cell Avidity and Killing Efficacy in Relation to Type 1 Diabetes Prediction

Anmar Khadra<sup>1</sup>, Massimo Pietropaolo<sup>2</sup>, Gerald T. Nepom<sup>3</sup>, Arthur Sherman<sup>1</sup>

<sup>1</sup>Laboratory of Biological Modeling

National Institute of Diabetes and Digestive and Kidney Diseases

National Institutes of Health, Bethesda, Maryland, USA

<sup>2</sup>Laboratory of Immunogenetics

University of Michigan, Ann Arbor, Michigan, USA

<sup>3</sup>Benaroya Research Institute at Virginia Mason, Seattle, Washington, USA

## A Model Scaling

### A.1 Scaled one-clone model

By making the following substitutions:  $t_c = T_c/\tilde{R}$  (here  $\tilde{R} := (\alpha^{1/2} - \delta_{T_c}^{1/2})^2/\epsilon$ ),  $b = \eta_0 B/\gamma$ ,  $p_c = \delta_{P_c} P_c/\gamma$ ,  $i_g = \delta_{I_g} \delta_{P_c} I_g/(a_2 \gamma)$ ,  $p = \delta_P P/(R\tilde{R}\beta_0)$  (here  $\beta_0$  is the initial number of beta cells),  $\beta_s = \beta/\beta_0$ , we get

$$\frac{dt_c}{dt} = \alpha t_c \frac{p}{p+k} - \delta_{T_c} t_c - (\alpha^{1/2} - \delta_{T_c}^{1/2})^2 t_c^2 \quad (\text{S1a})$$

$$\frac{db}{dt} = \eta_0 + (-\eta_2 p t_c + \eta_1 p - \eta_0) b \quad (\text{S1b})$$

$$\frac{dp_c}{dt} = \delta_{P_c} \left[ \frac{\eta_2 p t_c b}{\eta_0} - p_c \right] \quad (\text{S1c})$$

$$\frac{di_g}{dt} = \delta_{I_g} [\ell b + p_c - i_g] \quad (\text{S1d})$$

$$\frac{d\beta_s}{dt} = -\kappa \tilde{R} t_c \beta_s \quad (\text{S1e})$$

$$\frac{dp}{dt} = \delta_P [t_c \beta_s - p], \quad (\text{S1f})$$

where  $k = \delta_P \tilde{k}/(R\tilde{R}\beta_0)$ ,  $\eta_2 = \tilde{\eta}_2 R \tilde{R}^2 \beta_0/\delta_P$ ,  $\eta_1 = \tilde{\eta}_1 R \tilde{R} \beta_0/\delta_P$ , and  $\ell = a_1 \delta_{P_c}/(a_2 \eta_0)$ .

## A.2 Reduced/scaled one-clone model

Substituting the variables  $b, i_g$  and  $p$  by their steady states (fast variables) and assuming that  $\beta_s$  is roughly a constant (slow variable), i.e.  $\beta_s = 1$ , generates the following two-variable model

$$\frac{dt_c}{dt} = \alpha t_c \frac{t_c}{t_c + \bar{k}} - \delta_{T_c} t_c - (\alpha^{1/2} - \delta_{T_c}^{1/2})^2 t_c^2 \quad (\text{S2a})$$

$$\frac{dp_c}{dt} = \delta_{P_c} \left[ \frac{\eta_2 t_c^2}{\eta_2 t_c^2 - \eta_1 t_c + \bar{\eta}_0} - p_c \right], \quad (\text{S2b})$$

where  $\bar{k} = k/\beta_s (= k)$  (can be shown analytically to satisfy  $0 \leq \bar{k} \leq 1$ , see Section B) and  $\bar{\eta}_0 = \eta_0/\beta_s (= \eta_0)$ .

## A.3 Scaled two-clone model

By applying the following substitutions  $t_{cj} = T_{cj}/\tilde{R}$  (here  $\tilde{R} := (\alpha_{21}^{1/2} - \delta_{T_{c21}}^{1/2})^2/\epsilon$ ),  $b_j = \eta_{0j} B_j/\gamma_j$ ,  $p_{cj} = \delta_{P_{cj}} P_{cj}/\gamma_j$ ,  $i_{gj} = \delta_{I_{gj}} \delta_{P_{cj}} I_{gj}/(a_{2j} \gamma_j)$  and  $p_j = \delta_{P_j} P_j/(R_j \tilde{R} \beta_0)$  ( $j = 1, 2$ ), we obtain

$$\frac{dt_{c1j}}{dt} = \alpha_{1j} t_{c1j} \frac{p_1}{p_1 + k_{1j}} - \delta_{T_{c1j}} t_{c1j} - (\alpha_{21}^{1/2} - \delta_{T_{c21}}^{1/2})^2 t_{c1j} (t_{c11} + t_{c12}) \quad (\text{S3a})$$

$$\frac{dt_{c2j}}{dt} = \alpha_{2j} t_{c2j} \frac{p_2}{p_2 + k_{2j}} - \delta_{T_{c2j}} t_{c2j} - (\alpha_{21}^{1/2} - \delta_{T_{c21}}^{1/2})^2 t_{c2j} (t_{c21} + t_{c22}) \quad (\text{S3b})$$

$$\frac{db_j}{dt} = \eta_{0j} + \left[ -\eta_{2j} p_j G(t_{c11}, t_{c12}, t_{c21}, t_{c22}) + \eta_{1j} p_j - \eta_{0j} \right] b_j \quad (\text{S3c})$$

$$\frac{dp_{cj}}{dt} = \delta_{P_{cj}} \left[ \frac{\eta_{2j} p_j G(t_{c11}, t_{c12}, t_{c21}, t_{c22}) b_j}{\eta_{0j}} - p_{cj} \right] \quad (\text{S3d})$$

$$\frac{di_{gj}}{dt} = \delta_{I_{gj}} [\ell_j b_j + p_{cj} - i_{gj}] \quad (\text{S3e})$$

$$\frac{d\beta_s}{dt} = -\kappa \tilde{R} G(t_{c11}, t_{c12}, t_{c21}, t_{c22}) \beta_s \quad (\text{S3f})$$

$$\frac{dp_j}{dt} = \delta_{P_j} \left[ G(t_{c11}, t_{c12}, t_{c21}, t_{c22}) \beta_s - p_j \right], \quad (\text{S3g})$$

where  $k_j = \delta_{P_j} \tilde{k}_j/(R_j \tilde{R} \beta_0)$ ,  $\eta_{2j} = \tilde{\eta}_{2j} R_j \tilde{R}^2 \beta_0/\delta_{P_j}$ ,  $\eta_{1j} = \tilde{\eta}_{1j} R_j \tilde{R} \beta_{0j}/\delta_{P_j}$ , and  $\ell_j = a_{1j} \delta_{P_{cj}}/(a_{2j} \eta_{0j})$  (recall that  $G$  is linear).

## B Theoretical Results

### B.1 Nullclines and steady states

We focus in this section on the reduced model described by Eqs. (S2a)-(S2b) to find its steady states and determine under what conditions these steady states are stable. In order to do so, we examine the  $t_c$  and  $p_c$ -nullclines and their points of intersections (steady states).

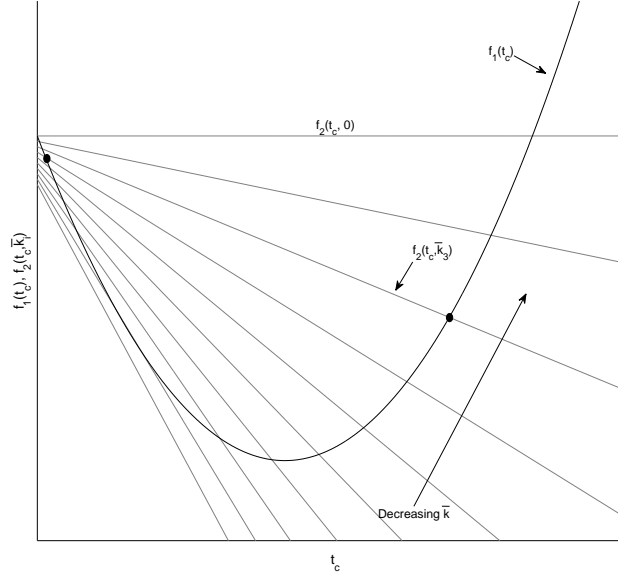

Fig. S1: A sketch of the functions  $f_1(t_c)$  and  $f_2(t_c, \bar{k})$  for several values of  $\bar{k}$ . These two functions are guaranteed to intersect at two points for  $0 \leq \bar{k} < 1$ , but become tangential at  $\bar{k} = 1$  and never intersect for  $\bar{k} > 1$ . The points of intersection are highlighted by black dots for one particular case, where the  $t_c$ -component of each point corresponds to the value of the vertical  $t_c$ -nullcline, i.e.  $t_c = t_{cr}$  defined by Eqn. (S5).

Equation (S2a) is independent of  $p_c$ , therefore its nullclines are vertical lines. Clearly,  $t_c = 0$  is one  $t_c$ -nullcline. For additional  $t_c$ -nullclines, we must have

$$\begin{aligned} \alpha \frac{t_c}{t_c + \bar{k}} &= \delta_{T_c} + (\alpha^{1/2} - \delta_{T_c}^{1/2})^2 t_c = 0 \\ (\alpha^{1/2} - \delta_{T_c}^{1/2})^2 t_c^2 - (\alpha - \delta_{T_c}) t_c &= -\bar{k} [\delta_{T_c} + (\alpha^{1/2} - \delta_{T_c}^{1/2})^2 t_c]. \end{aligned} \quad \Longleftrightarrow \quad (S4)$$

Let  $f_1(t_c) := (\alpha^{1/2} - \delta_{T_c}^{1/2})^2 t_c^2 - (\alpha - \delta_{T_c}) t_c$  and  $f_2(t_c, \bar{k}) := -\bar{k} [\delta_{T_c} + (\alpha^{1/2} - \delta_{T_c}^{1/2})^2 t_c]$ . Fig. S1 shows typically the graphs of these two functions  $(f_1, f_2)$  intersecting at two points when the avidity of T cells is high

enough (i.e, when  $\bar{k}$  is small enough) and do not intersect otherwise. To determine the parameter range for  $\bar{k}$  in which the two curves  $f_1, f_2$  intersect, we solve for the roots of  $t_c$  from the quadratic Eqn. (S4). By letting  $a := \alpha^{1/2} - \delta_{T_c}^{1/2} > 0$  and  $b := \alpha^{1/2} + \delta_{T_c}^{1/2}$ , we deduce that the roots of Eqn. (S4) are

$$t_{cr} = \frac{a(b - a\bar{k}) \pm \sqrt{a^2(b - a\bar{k})^2 - 4a^2\bar{k}\delta_{T_c}}}{2a^2}. \quad (\text{S5})$$

To obtain real roots, we require the quantity inside the square root to be non-negative, i.e.  $(b - a\bar{k})^2 - 4\bar{k}\delta_{T_c} \geq 0$ . It follows that

$$\begin{aligned} b^2 - 2ab\bar{k} + a^2\bar{k}^2 - 4\bar{k}\delta_{T_c} &\geq 0 && \Longleftrightarrow \\ b^2 - 2(\alpha - \delta_{T_c})\bar{k} + a^2\bar{k}^2 - 4\delta_{T_c}\bar{k} &\geq 0 && \Longleftrightarrow \\ b^2 - 2\alpha\bar{k} + a^2\bar{k}^2 - 2\delta_{T_c}\bar{k} &\geq 0. \end{aligned}$$

But  $-2\alpha\bar{k} - 2\delta_{T_c}\bar{k} = -2\bar{k}(\alpha + \delta_{T_c}) = -\bar{k}(a^2 + b^2)$ . Hence

$$\begin{aligned} a^2\bar{k}^2 - (a^2 + b^2)\bar{k} + b^2 &\geq 0 && \Longleftrightarrow \\ a^2\bar{k}(\bar{k} - 1) - b^2(\bar{k} - 1) &\geq 0, \end{aligned}$$

which implies that

$$(a^2\bar{k} - b^2)(\bar{k} - 1) \geq 0. \quad (\text{S6})$$

Inequality (S6) is satisfied either when  $\bar{k} \geq (b/a)^2 > 1$  or  $0 \leq \bar{k} \leq 1 < (b/a)^2$ . If  $\bar{k} \geq (b/a)^2$ , then one of the  $t_{cr} < 0$ , a physiologically irrelevant case. However, if  $0 \leq \bar{k} \leq 1$ , then both  $t_{cr} > 0$  and the graphs of the two functions  $f_1, f_2$  intersect at either one point (i.e. they are tangential to each other) when  $\bar{k} = 1$ , or intersect at two points when  $0 \leq \bar{k} < 1$ , as demonstrated in Fig. S1. Thus, two physiologically relevant  $t_c$ -nullclines (vertical lines) are obtained in the interval  $\bar{k} \in [0, 1)$ .

By solving for  $p_c$  in Eqn. (S2b), we obtain the  $p_c$ -nullcline, given by

$$p_c = \frac{\eta_2 t_c^2}{\eta_2 t_c^2 - \eta_1 t_c + \bar{\eta}_0}$$

The points of intersection of the  $t_c$ - and  $p_c$ -nullclines are the steady states of Eqs. (S2a)-(S2b). There are three such intersections; namely, the point  $\mathbf{S}_1 := (0, 0)$ , corresponding to a healthy state (with no effector CD8<sup>+</sup> T-cell, CD4<sup>+</sup> T-cell or plasma-cell accumulation); the point  $\mathbf{U}$ , whose  $t_c$ -component is the left

black dot shown in Fig. S1; and the point  $\mathbf{S}_2$ , corresponding to an autoimmune state (with elevated level of  $\text{CD8}^+$  T cells,  $\text{CD4}^+$  T cells and plasma cells), whose  $t_c$ -component is the right black dot in Fig. S1. These steady states can all coexist provided that  $\bar{k} \in [0, 1)$ . We demonstrate below that  $\mathbf{S}_1$  and  $\mathbf{S}_2$  are stable, while  $\mathbf{U}$  is unstable.

Fig. S1 reveals that increasing T-cell avidity (i.e. decreasing  $\bar{k}$  within  $[0, 1)$ ) shifts the right black dot of intersection (and thus the corresponding  $t_c$ -nullcline) to the right. This shift is accompanied by an elevation in the level of autoreactive T cells in the autoimmune state  $\mathbf{S}_2$ . The left black dot of intersection, on the other hand, is shifted to the left against the origin, compressing the basin of attraction of the healthy state  $\mathbf{S}_1$ . Details of these various configurations are explained in detail in the main text.

Notice that the denominator in the equation of  $p_c$ -nullcline could be zero (in which case, the  $p_c$ -nullcline will have a vertical asymptote). This may lead to an unbounded increase in the level of T cells in the autoimmune state  $\mathbf{S}_2$  while varying  $\bar{k}$ , a feature considered unrealistic biologically (see Fig. S1(a)). To avoid this situation, we impose the condition  $\eta_1^2 < 4\eta_2\bar{\eta}_0$

## B.2 Stability analysis

The Jacobian matrix of Eqs. (S2a)-(S2b) is given by

$$J = \begin{pmatrix} \frac{2\alpha t_c}{t_c + \bar{k}} - \frac{\alpha t_c^2}{(t_c + \bar{k})^2} - \delta_{T_c} - 2(\alpha^{1/2} - \delta_{T_c}^{1/2})^2 t_c & 0 \\ \delta_{P_c} \left[ \frac{2\eta_2 t_c}{\eta_2 t_c^2 - \eta_1 t_c + \bar{\eta}_0} - \frac{\eta_2 t_c^2 (2\eta_2 t_c - \eta_1)}{(\eta_2 t_c^2 - \eta_1 t_c + \bar{\eta}_0)^2} \right] & -\delta_{P_c} \end{pmatrix}.$$

The eigenvalues of  $J|_{\mathbf{S}_1}$  are  $\lambda_1 = -\delta_{T_c}$  and  $\lambda_2 = -\delta_{P_c}$  both of which are negative, so the healthy state is always stable. In the presence of the two other steady states, the autoimmune state  $\mathbf{S}_2$  is also stable while the steady state  $\mathbf{U}$  is unstable. The  $t_c$ -nullcline passing through  $\mathbf{U}$  is the separatrix between the basins of attraction of the two states  $\mathbf{S}_1$  and  $\mathbf{S}_2$ .

## B.3 B-cell-dependent T-cell activation

In one of the model assumptions stated in the main text, we ignored the direct role of B cells in activating T cells and assumed that the three types of APCs under consideration (DCs, macrophages and B cells)

act uniformly on the T-cell population. We also assumed that the population size of APCs is roughly constant. Here we show that having a separate pool of B cells that acts directly on T cells as APCs for activation and cell replication, does not significantly alter the general behaviour of the reduced one-clone model.

To varify this, we modify Eqn. (S2a) to account for B-cell activation of T cells, as follows

$$\frac{dt_c}{dt} = (\alpha_B b + \bar{\alpha}) t_c \frac{t_c}{t_c + \bar{k}} - \delta_{T_c} t_c - (\alpha^{1/2} - \delta_{T_c}^{1/2})^2 t_c^2, \quad (\text{S7})$$

where  $\alpha_B b t_c^2 / (t_c + \bar{k})$  is the B-cell-dependent T-cell activation occuring at a rate  $\alpha_B$  and satisfying  $\alpha_B b + \bar{\alpha} \approx \alpha$ . (This equation derives from the non-scaled form as done before.) Including such terms in the dynamic equation of  $t_c$  generates a cubic-shped  $t_c$ -nullcline by joining the two right vertical nullcline associated with Eqs. (S2a)-(S2b) (see Fig. S2. Increasing the value of  $a_B$  decreases the steepness of this cubic nullcline and alightly alters the location of the steady states  $\mathbf{S}_2$  and  $\mathbf{U}$ , but does not their stability. This suggests that the approximation used in Eqn. (S2a) is justifiable.

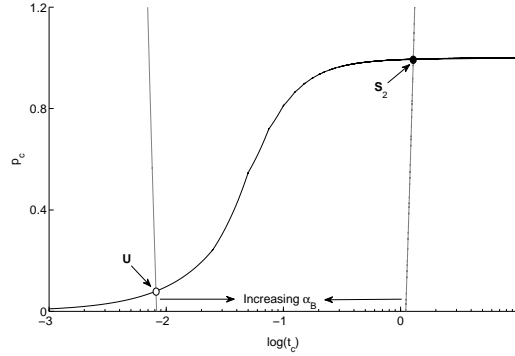

Fig. S2: The phase plane of Eqs. (S7) and (S2b), displaying the  $t_c$ - and  $p_c$ -nullclines for  $a_B = 0.5$  ( $t_c = 0$  nullcline is not shown because the  $c$ -axis is in logarithmic scale). The two gray lines are the  $t_c$ -nullclines, while the Hill-like black line is the  $p_c$ -nullcline. The stable steady state  $\mathbf{S}_2$ , shown as black dot, is the autoimmune state as before, while the unstable steady state  $\mathbf{U}$  is shown as a white dot. (The healthy state  $\mathbf{S}_1$  is not shown.) Including the term  $\alpha_B b t_c^2 / (t_c + \bar{k})$  in the dynamic equation of  $t_c$  modified the shape of the  $t_c$ -nullclines only slightly.
